# Supplementary material
Source: Research Square preprint supplement (doi:10.21203/rs.3.rs-9213778/v1)
Supplement: Supplementary file 1 [file 3ae7dd1523766a5573494a46.xlsx]

## Sheet: Sheet1
Table S4. C-index of 37 HCC prognostic models
model	PMID	Cancer	Author	Coef	symbol
Bai-Y	37260986	HCC	Bai-Y	-0.022	AAAS
Bai-Y	37260986	HCC	Bai-Y	0.016	CANT1
Bai-Y	37260986	HCC	Bai-Y	-0.098	CLP1
Bai-Y	37260986	HCC	Bai-Y	-0.016	DGUOK
Bai-Y	37260986	HCC	Bai-Y	0.018	GTF2B
Bai-Y	37260986	HCC	Bai-Y	0.034	GTF2H1
Bai-Y	37260986	HCC	Bai-Y	0.042	NCBP2
Bai-Y	37260986	HCC	Bai-Y	0.089	POLA1
Bai-Y	37260986	HCC	Bai-Y	0.015	POLE4
Bai-Y	37260986	HCC	Bai-Y	0.047	POLR2D
Bai-Y	37260986	HCC	Bai-Y	0.007	POLR2E
Cao-L	37470852	HCC	Cao-L	0.136	BMI1
Cao-L	37470852	HCC	Cao-L	0.088	AGPS
Cao-L	37470852	HCC	Cao-L	0.076	RAP2A
Cao-L	37470852	HCC	Cao-L	0.162	FAM83D
Cao-L	37470852	HCC	Cao-L	0.085	SKP2
Cao-L	37470852	HCC	Cao-L	-0.122	SLC2A2
Cao-L	37470852	HCC	Cao-L	0.109	SGCB
Cao-L	37470852	HCC	Cao-L	-0.064	SPP2
Chi-H	37006257	HCC	Chi-H	-0.0712	HLA-A
Chi-H	37006257	HCC	Chi-H	-0.0878	ITM2A
Chi-H	37006257	HCC	Chi-H	-0.1846	PTPN7
Chi-H	37006257	HCC	Chi-H	0.1181	IL2RG
Chi-H	37006257	HCC	Chi-H	-0.1403	LTB
Chi-H	37006257	HCC	Chi-H	0.2926	TNFRSF4
Chi-H	37006257	HCC	Chi-H	-0.0811	TNFRSF18
Chi-H	37006257	HCC	Chi-H	0.0145	TMSB10
Chi-H	37006257	HCC	Chi-H	-0.1721	TBC1D10C
Chi-H	37006257	HCC	Chi-H	0.1368	ARPC1B
Chi-H	37006257	HCC	Chi-H	0.2523	CTSC
Ding-XJ	37064147	HCC	Ding-XJ	0.0606	GSK3B
Ding-XJ	37064147	HCC	Ding-XJ	0.0326	AXIN1
Ding-XJ	37064147	HCC	Ding-XJ	0.2757	RAC1
Ding-XJ	37064147	HCC	Ding-XJ	0.2323	KEAP1
Ding-XJ	37064147	HCC	Ding-XJ	0.0852	EHD1
Ding-XJ	37064147	HCC	Ding-XJ	0.2713	GRB2
Ding-XJ	37064147	HCC	Ding-XJ	0.3377	SNX5
Du-YX	34248650	HCC	Du-YX	0.1503	METTL3
Du-YX	34248650	HCC	Du-YX	0.0877	YTHDF2
Du-YX	34248650	HCC	Du-YX	0.0274	YTHDF1
Du-YX	34248650	HCC	Du-YX	-0.1197	ZC3H13
Gao-QN	36250027	HCC	Gao-QN	-0.0215	DCN
Gao-QN	36250027	HCC	Gao-QN	0.0335	HMMR
Gao-QN	36250027	HCC	Gao-QN	-0.0422	ID1
Gao-QN	36250027	HCC	Gao-QN	0.0348	NEB
Gao-QN	36250027	HCC	Gao-QN	-0.0183	COLEC10
Gao-QN	36250027	HCC	Gao-QN	-0.0086	INMT
Gao-QN	36250027	HCC	Gao-QN	0.0866	UBE2S
Gao-QN	36250027	HCC	Gao-QN	0.0646	FLVCR1
Guo-Y	34646769	HCC	Guo-Y	1.493	BUB1B
Guo-Y	34646769	HCC	Guo-Y	-1.192	CENPF
Huo-JY	33300278	HCC	Huo-JY	-0.00248	CYP3A5
Huo-JY	33300278	HCC	Huo-JY	-0.00445	ALAS1
Huo-JY	33300278	HCC	Huo-JY	0.003267	PRDX1
Huo-JY	33300278	HCC	Huo-JY	-0.00887	GOT2
Huo-JY	33300278	HCC	Huo-JY	0.078805	AMD1
Huo-XX	32807131	HCC	Huo-XX	0.42	HDAC1
Huo-XX	32807131	HCC	Huo-XX	0.54	RHEB
Huo-XX	32807131	HCC	Huo-XX	0.62	ATIC
Huo-XX	32807131	HCC	Huo-XX	1.37	SPNS1
Huo-XX	32807131	HCC	Huo-XX	0.21	SQSTM1
Li-BH	28717245	HCC	Li-BH	0.384	RTN3
Li-BH	28717245	HCC	Li-BH	-0.561	SOCS2
Li-BH	28717245	HCC	Li-BH	-0.434	UPB1
Liu-T	37575252	HCC	Liu-T	0.176	DYNLT1
Liu-T	37575252	HCC	Liu-T	0.1235	ADAM9
Liu-T	37575252	HCC	Liu-T	0.1192	SCARB1
Liu-T	37575252	HCC	Liu-T	0.1114	PPARG
Liu-T	37575252	HCC	Liu-T	0.099	HAVCR1
Liu-T	37575252	HCC	Liu-T	0.0793	GAPDH
Liu-T	37575252	HCC	Liu-T	0.0647	LGALS3
Liu-T	37575252	HCC	Liu-T	0.0624	SIRT6
Liu-T	37575252	HCC	Liu-T	-0.0997	IL33
Liu-YX	37406019	HCC	Liu-YX	0.241807	FDPS
Liu-YX	37406019	HCC	Liu-YX	0.559395	SRM
Liu-YX	37406019	HCC	Liu-YX	0.229623	NDRG1
Long-JY	31695766	HCC	Long-JY	0.0242	SPP1
Long-JY	31695766	HCC	Long-JY	-0.1597	LCAT
Ma-Q	36760376	HCC	Ma-Q	0.175	TXNRD1
Ma-Q	36760376	HCC	Ma-Q	0.1245	FTL
Ma-Q	36760376	HCC	Ma-Q	0.4628	GPX4
Ma-Q	36760376	HCC	Ma-Q	0.0366	PRDX1
Ma-Q	36760376	HCC	Ma-Q	0.2921	VDAC2
Ma-Q	36760376	HCC	Ma-Q	0.045	OTUB1
Ma-Q	36760376	HCC	Ma-Q	0.2476	NRAS
Ma-Q	36760376	HCC	Ma-Q	0.126	SLC38A1
Ma-Q	36760376	HCC	Ma-Q	0.0223	SLC1A5
Pan-QB	33818013	HCC	Pan-QB	0.369537	BIRC3
Pan-QB	33818013	HCC	Pan-QB	0.727258	CSNK1E
Pan-QB	33818013	HCC	Pan-QB	-0.885485	MINK1
Pan-QB	33818013	HCC	Pan-QB	0.308064	MYC
Pan-QB	33818013	HCC	Pan-QB	2.50609	NF2
Peng-XY	36248822	HCC	Peng-XY	0.257	TAF6
Peng-XY	36248822	HCC	Peng-XY	-0.093	SPP2
Peng-XY	36248822	HCC	Peng-XY	-0.112	CFHR4
Peng-XY	36248822	HCC	Peng-XY	-0.205	DNASE1L3
Qin-HT	36891150	HCC	Qin-HT	0.1242	CDKN2A
Qin-HT	36891150	HCC	Qin-HT	0.2058	DLAT
Qin-HT	36891150	HCC	Qin-HT	0.0795	GLS
Tang-LS	36051877	HCC	Tang-LS	0.1216	FABP5
Tang-LS	36051877	HCC	Tang-LS	0.0757	ANXA2
Tang-LS	36051877	HCC	Tang-LS	0.1984	FDPS
Tang-LS	36051877	HCC	Tang-LS	-0.0979	HMGCS2
Tang-LS	36051877	HCC	Tang-LS	-0.0142	ACADL
Tang-YC	34975331	HCC	Tang-YC	0.400506	DBF4
Tang-YC	34975331	HCC	Tang-YC	0.18824	ARG2
Tang-YC	34975331	HCC	Tang-YC	0.204192	SLC16A3
Wang-KP	33260154	HCC	Wang-KP	0.0252	SPP1
Wang-KP	33260154	HCC	Wang-KP	0.0964	STC2
Wang-KP	33260154	HCC	Wang-KP	0.0763	HSPA8
Wang-KP	33260154	HCC	Wang-KP	0.0673	IL15RA
Wang-KP	33260154	HCC	Wang-KP	-0.0102	BLNK
Wang-KP	33260154	HCC	Wang-KP	0.1197	TRAF3
Wang-KP	33260154	HCC	Wang-KP	0.0486	NOD2
Wang-KP	33260154	HCC	Wang-KP	0.0485	GRB2
Wang-KP	33260154	HCC	Wang-KP	0.0262	ACTG1
Wang-KP	33260154	HCC	Wang-KP	0.1284	HDAC1
Wang-KP	33260154	HCC	Wang-KP	0.0587	S100A9
Wang-KP	33260154	HCC	Wang-KP	0.2254	PSMD1
Wang-KP	33260154	HCC	Wang-KP	0.0855	EPO
Wang-ZH	33758763	HCC	Wang-ZH	0.031755	COX7B2
Wang-ZH	33758763	HCC	Wang-ZH	-2.27007	SCN4A
Wang-ZH	33758763	HCC	Wang-ZH	-0.15919	MOGAT2
Wang-ZH	33758763	HCC	Wang-ZH	0.164689	FLVCR1
Wang-ZH	33758763	HCC	Wang-ZH	0.02915	RRM2
Wang-ZH	33758763	HCC	Wang-ZH	0.068413	SLC5A11
Wei-XY	36845708	HCC	Wei-XY	0.39335	EZH2
Wei-XY	36845708	HCC	Wei-XY	0.14361	PRKAA2
Wei-XY	36845708	HCC	Wei-XY	0.08324	SPP1
Xiang-XH	31011256	HCC	Xiang-XH	0.243	KIF18B
Xiang-XH	31011256	HCC	Xiang-XH	0.274	CEP55
Xiang-XH	31011256	HCC	Xiang-XH	0.282	CIT
Xiang-XH	31011256	HCC	Xiang-XH	0.266	MCM7
Xiang-XH	31011256	HCC	Xiang-XH	0.678	CDC45
Xiang-XH	31011256	HCC	Xiang-XH	0.175	EZH2
Xiang-XH	31011256	HCC	Xiang-XH	0.536	MCM5
Xiong-C	37736789	HCC	Xiong-C	0.128543	E2F1
Xiong-C	37736789	HCC	Xiong-C	0.0445205	BRMS1
Xiong-C	37736789	HCC	Xiong-C	0.259098	ITGA5
Xiong-C	37736789	HCC	Xiong-C	0.280759	PTRH2
Xiong-C	37736789	HCC	Xiong-C	0.214274	PTK2
Xiong-C	37736789	HCC	Xiong-C	0.0501536	BMF
Xue-F	32518711	HCC	Xue-F	-0.05983	CFHR1
Xue-F	32518711	HCC	Xue-F	-0.01437	APOA2
Xue-F	32518711	HCC	Xue-F	-0.10219	IL27
Xue-F	32518711	HCC	Xue-F	0.10394	CTSE
Xue-F	32518711	HCC	Xue-F	-0.18521	FCGRT
Xue-F	32518711	HCC	Xue-F	0.37195	NCOA6
Xue-F	32518711	HCC	Xue-F	-0.11573	CD1D
Xu-WF	33351066	HCC	Xu-WF	0.0326	VPS35
Xu-WF	33351066	HCC	Xu-WF	0.1966	VPS26A
Xu-WF	33351066	HCC	Xu-WF	0.0213	PRKCD
Xu-WF	33351066	HCC	Xu-WF	0.2453	BIRC5
Xu-WF	33351066	HCC	Xu-WF	0.1205	HMOX1
Xu-WF	33351066	HCC	Xu-WF	0.1554	VEGFA
Xu-WF	33351066	HCC	Xu-WF	0.4405	WAC
Xu-WF	33351066	HCC	Xu-WF	0.3583	FEZ2
Yang-HB	33771191	HCC	Yang-HB	0.03974	SRXN1
Yang-HB	33771191	HCC	Yang-HB	0.003247	LDHA
Yang-HB	33771191	HCC	Yang-HB	0.022758	TFDP1
Yang-HB	33771191	HCC	Yang-HB	0.037018	PPM1G
Yang-HB	33771191	HCC	Yang-HB	0.063182	EIF2S1
Yang-WX	36894886	HCC	Yang-WX	0.1065	FLVCR1
Yang-WX	36894886	HCC	Yang-WX	0.3748	CENPE
Yang-WX	36894886	HCC	Yang-WX	-0.0082	LCAT
Yang-WX	36894886	HCC	Yang-WX	-0.0019	CYP2C9
Yang-WX	36894886	HCC	Yang-WX	0.0019	NQO1
Yang-Y	34262941	HCC	Yang-Y	0.165048	BIRC5
Yang-Y	34262941	HCC	Yang-Y	0.135792	KITLG
Yang-Y	34262941	HCC	Yang-Y	0.0483866	PGF
Yang-Y	34262941	HCC	Yang-Y	0.0676935	SPP1
Yang-Y	34262941	HCC	Yang-Y	0.0407522	SHC1
Yuan-CY	34150630	HCC	Yuan-CY	0.209817	G6PD
Yuan-CY	34150630	HCC	Yuan-CY	0.123705	AKR1B15
Yuan-CY	34150630	HCC	Yuan-CY	0.230463	HMMR
Yuan-CY	34150630	HCC	Yuan-CY	0.211198	CSPG5
Yuan-CY	34150630	HCC	Yuan-CY	0.271858	ELOVL3
Yuan-CY	34150630	HCC	Yuan-CY	0.0373145	FABP6
Zhang-GH	36307751	HCC	Zhang-GH	0.194181	GLP2R
Zhang-GH	36307751	HCC	Zhang-GH	-0.0342166	C7
Zhang-GH	36307751	HCC	Zhang-GH	-0.0408414	IL1RL1
Zhang-GH	36307751	HCC	Zhang-GH	0.0313758	CXCL6
Zhang-GH	36307751	HCC	Zhang-GH	0.111031	CHST4
Zhang-GH	36307751	HCC	Zhang-GH	-0.142247	CLEC1B
Zhang-GH	36307751	HCC	Zhang-GH	-0.114121	GPR182
Zhang-GH	36307751	HCC	Zhang-GH	-0.145436	INMT
Zhang-GH	36003068	HCC	Zhang-GH	0.0701293	AGR2
Zhang-GH	36003068	HCC	Zhang-GH	0.42893	SSR2
Zhang-GH	36003068	HCC	Zhang-GH	-0.129031	PON1
Zhang-GH	36003068	HCC	Zhang-GH	0.407696	TMCC1
Zhang-GX	36110938	HCC	Zhang-GX	0.389933	ANGPT2
Zhang-GX	36110938	HCC	Zhang-GX	0.108256	SERPINE1
Zhang-GX	36110938	HCC	Zhang-GX	0.12171	SPP1
Zhang-Q	36324575	HCC	Zhang-Q	-0.04	OGDHL
Zhang-Q	36324575	HCC	Zhang-Q	0.23	DLAT
Zhang-Q	36324575	HCC	Zhang-Q	0.11	CDKN2A
Zhang-Q	36324575	HCC	Zhang-Q	0.05	GLS
Zhang-Q	36324575	HCC	Zhang-Q	0.06	IDH3B
Zhang-Q	36324575	HCC	Zhang-Q	0.02	IDH3G
Zhang-Q	36324575	HCC	Zhang-Q	0.01	IDH1
Zhang-Q	36324575	HCC	Zhang-Q	0.15	LIPT1
Zhang-W	36572736	HCC	Zhang-W	-0.0045	AKR1D1
Zhang-W	36572736	HCC	Zhang-W	0.2253	NPC1
Zhang-W	36572736	HCC	Zhang-W	0.1733	FABP6
Zhang-W	36572736	HCC	Zhang-W	0.023	MAPK3
Zhou-Z	36588699	HCC	Zhou-Z	0.1645	CDKN2A
Zhou-Z	36588699	HCC	Zhou-Z	0.3033	DLAT
Zhou-Z	36588699	HCC	Zhou-Z	-0.096	DLST
Zhou-Z	36588699	HCC	Zhou-Z	0.1196	GLS
Zhou-Z	36588699	HCC	Zhou-Z	0.0289	PDHA1
Zhou-ZY	35356430	HCC	Zhou-ZY	0.002	POMGNT1
Zhou-ZY	35356430	HCC	Zhou-ZY	0.231	DPM1
Zhou-ZY	35356430	HCC	Zhou-ZY	0.222	B4GALT3
Zhou-ZY	35356430	HCC	Zhou-ZY	0.122	B4GALT2
Zhou-ZY	35356430	HCC	Zhou-ZY	0.212	B4GALNT1
Zhou-ZY	35356430	HCC	Zhou-ZY	0.304	B3GAT3
Zhu-ZP	32518728	HCC	Zhu-ZP	0.00155586	G6PD
Zhu-ZP	32518728	HCC	Zhu-ZP	0.00310357	LPCAT1
Zhu-ZP	32518728	HCC	Zhu-ZP	0.00632401	ME1
Zhu-ZP	32518728	HCC	Zhu-ZP	0.00262853	PRIM1
Zhu-ZP	32518728	HCC	Zhu-ZP	0.00979851	RRM2
Zhu-ZP	32518728	HCC	Zhu-ZP	0.00783495	TXNRD1
Zhu-ZP	32518728	HCC	Zhu-ZP	0.0572816	UCK2
Zhu-ZP	32518728	HCC	Zhu-ZP	0.0616475	CAD
Zhu-ZP	32518728	HCC	Zhu-ZP	0.00849923	DTYMK
Zhu-ZP	32518728	HCC	Zhu-ZP	0.0369174	ENTPD2
