# Supplementary material
Source: Research Square preprint supplement (doi:10.21203/rs.3.rs-9213778/v1)
Supplement: Supplementary file 2 [file 4447f0d9c9226ea996cf72ef.xlsx]

## Sheet: Sheet1
Table S1. The details of 4 datasets enrolled in this study.
Accession number	Platform	Number of cells/patients	Treatment information
GSE140228	Illumina HiSeq 4000 (Homo sapiens)	3817	No
TCGA-LIHC	Illumina RNAseq	369	No
ICGC-LIRI-JP	Illumina RNAseq	232	No
GSE14520	Affymetrix Human Genome U133A Array	221	No
