# Supplementary material
Source: Research Square preprint supplement (doi:10.21203/rs.3.rs-9213778/v1)
Supplement: Supplementary file 3 [file 5820a5d5cfbbe62679eea7bc.xlsx]

## Sheet: Sheet1
Table 2. Primer sequences
Gene	Primer sequences (5′–3′)
GAPDH F	AGGTCGGTGTGAACGGATTTG
GAPDH R	TGTAGACCATGTAGTTGAGGTCA
PDIA6 F	AGCCCTGAAGCTGGTGAAGA
PDIA6 R	CCACAGCAGAGTCACGAAGA
