# Supplementary material
Source: Research Square preprint supplement (doi:10.21203/rs.3.rs-9213778/v1)
Supplement: Supplementary file 5 [file 974ff980e7af98a0962c5c65.xlsx]

## Sheet: Sheet1
Table 1. siRNA sequences
siRNA	Sequences
siPDIA6-1	UGACCUCAACUACAUGGUUTT
Si-NC	UUCUCCGAACGUGUCACGUTT
