# Supplementary material
Source: Research Square preprint supplement (doi:10.21203/rs.3.rs-9213778/v1)
Supplement: Supplementary file 6 [file b29ffc69ac0ed91a86b25841.docx]

**Figure legends**

**Supplementary Fig. 1 | Validation of immune cell type annotation by canonical marker gene expression in single-cell RNA-seq data.**

**a–e,** t-SNE feature plots showing the expression patterns of canonical marker genes used to validate immune cell type annotation in the single-cell dataset. **a,** Expression of T cell markers CD3E and CD3D. **b,** Expression of natural killer (NK) cell markers NCR1 and KLRC1. **c,** Expression of monocyte markers CD163 and CD68. **d,** Expression of B cell markers CD19 and CD79A. **e,** Expression of dendritic cell (DC) markers XCR1 and CLEC9A.

Color intensity represents the normalized expression level of each gene in individual cells. The distribution patterns of these marker genes are consistent with the annotated cell clusters shown in Figure 1, supporting the accuracy and robustness of immune cell classification.

**Supplementary Fig. 2 | Independent prognostic analysis and further evaluation of the tumor immune microenvironment and immunotherapy response with external validation.**

**a,** Forest plot of the multivariate Cox proportional hazards regression analysis incorporating clinical characteristics and molecular subtypes in the TCGA-LIHC cohort. The results establish the C2 subtype as an independent risk factor for poor overall survival in hepatocellular carcinoma patients. **b,** Comparison of the transcriptional expression levels of antigen-presenting molecules and multiple immune checkpoints (e.g., CD27, PDCD1, CTLA4, and LAG3) among the three molecular subtypes (C1, C2, and C3). **c,** Relative infiltration levels (scores) of various immune cell subpopulations across the molecular subtypes, quantified using the ssGSEA algorithm. The C3 subtype demonstrates an "immuno-hot" phenotype, characterized by a significantly higher abundance of activated B cells, activated CD4 T cells, activated CD8 T cells, and immature B cells. **d,** Submap analysis predicting the likelihood of clinical response to immune checkpoint inhibitors (anti-PD-1 and anti-CTLA-4) across the subtypes within the ICGC-LIRI validation cohort. **e, f,** Comparison of T-cell-inflamed signature (TIS) scores across molecular subtypes in the validation cohorts, assessing the potential clinical benefit from immune checkpoint blockade. **g–i,** Evaluation of the functional components of the Immunophenoscore (IPS) within the validation cohorts , illustrating the distribution and significant differences in effector cell (EC_IPS, g), suppressor cell (SC_IPS, h), and checkpoint (CP_IPS, i) scores among the three subgroups.

Statistical Note: Data comparisons among groups were performed using the Kruskal-Wallis test or Wilcoxon rank-sum test. Statistical significance is denoted as: * P < 0.05; ** P < 0.01; *** P < 0.001; ns, not significant.
