# Supplementary material
Source: Research Square preprint supplement (doi:10.21203/rs.3.rs-9213778/v1)
Supplement: Supplementary file 7 [file b2aecc0924f7805735086316.xlsx]

## Sheet: Sheet1
Table S3. The 27 immune checkpoints enrolled in this study.
Gene	Category
CD274	B7-CD28
CD276	B7-CD28
CTLA4	B7-CD28
HHLA2	B7-CD28
ICOS	B7-CD28
ICOSLG	B7-CD28
PDCD1	B7-CD28
PDCD1LG2	B7-CD28
TMIGD2	B7-CD28
VTCN1	B7-CD28
BTLA	TNF superfamily
CD27	TNF superfamily
CD40	TNF superfamily
CD40LG	TNF superfamily
CD70	TNF superfamily
TNFRSF18	TNF superfamily
TNFRSF4	TNF superfamily
TNFRSF9	TNF superfamily
TNFSF14	TNF superfamily
ENTPD1	Others
FGL1	Others
HAVCR2	Others
IDO1	Others
LAG3	Others
NCR3	Others
NT5E	Others
SIGLEC15	Others
