# Supplementary material
Source: Research Square preprint supplement (doi:10.21203/rs.3.rs-9213778/v1)
Supplement: Supplementary file 8 [file cc0102416a04ff5d490cc909.xlsx]

## Sheet: Table S5
Table S5. 71 genes associated with HCC prognosis.
ID	HR	HR.95L	HR.95H	pvalue
CD79A	0.776368	0.632135	0.953509	0.0157803
FCRL5	0.295356	0.0921151	0.947024	0.0402158
BLNK	0.609093	0.457756	0.810462	0.000668997
CPNE5	0.636727	0.405869	0.998897	0.0494413
COBLL1	0.584808	0.446938	0.765208	9.20049e-05
TNFRSF13C	0.438231	0.208387	0.921581	0.0296086
MZB1	0.810243	0.673413	0.974874	0.025774
ENAM	1.64333	1.08051	2.49931	0.0202363
KCNN3	0.274539	0.125893	0.598698	0.0011558
GNG7	0.632135	0.484018	0.825577	0.000759688
PYCR1	1.1715	1.02911	1.33359	0.01667
CD79B	0.680542	0.49349	0.938493	0.0189204
ZNF215	2.32709	1.42823	3.79167	0.000696454
ST6GALNAC4	1.56158	1.20973	2.01577	0.000622329
TCF4	0.494468	0.292597	0.835617	0.00851842
BLOC1S5-TXNDC5	1.93235	1.09154	3.42082	0.0237871
MEF2C	0.498569	0.309023	0.804378	0.00434535
PRDX4	1.5243	1.05195	2.20875	0.0259077
CKAP4	1.4622	1.11855	1.91143	0.00544244
SPATS2	2.74724	1.74225	4.33193	1.3659e-05
P2RX1	0.319972	0.141946	0.721275	0.00599861
TP53INP1	0.79958	0.63949	0.999749	0.0497429
STAP1	0.415289	0.181468	0.950389	0.0374864
ST6GAL1	0.787059	0.646648	0.957957	0.0169226
TXNDC11	0.523264	0.321336	0.852083	0.00923058
CD24	1.15811	1.03628	1.29425	0.00964001
MS4A1	0.60691	0.3804	0.968297	0.0361596
SRPRB	1.87243	1.11033	3.15762	0.0186489
TSPAN13	1.18267	1.03238	1.35484	0.01554
PLEKHG1	0.600293	0.391245	0.921038	0.0194619
MEI1	0.443775	0.2245	0.877223	0.0194532
TCF3	1.91009	1.26302	2.88868	0.00216676
CADM1	0.766472	0.62081	0.946312	0.0133946
ALG5	0.458074	0.295992	0.708911	0.000458335
FAM214A	0.445097	0.30663	0.646093	2.06826e-05
ATP2A3	0.614881	0.455361	0.830285	0.00150519
SMARCB1	1.62832	1.04247	2.5434	0.0321315
BCL11A	1.96195	1.26138	3.05162	0.00278726
SEL1L	0.708258	0.511778	0.98017	0.0374534
CD27	0.76976	0.60648	0.976998	0.0314549
DNAJC10	1.64378	1.02567	2.63441	0.0388973
ODC1	1.4026	1.08607	1.81138	0.00952239
PDIA6	1.49694	1.08467	2.06592	0.0141106
CALU	1.69296	1.21463	2.35966	0.00188543
CDCA7L	1.62748	1.2187	2.17337	0.000966139
FNDC3A	0.715828	0.543045	0.943584	0.0176936
E2F5	2.15234	1.48347	3.12279	5.4158e-05
ERGIC3	2.54701	1.43925	4.50739	0.00132614
ATP6V1C2	1.8879	1.03769	3.43473	0.0374225
SEC61A1	2.16892	1.44985	3.24463	0.000164852
SYVN1	0.632413	0.424262	0.942688	0.0244654
SSR3	2.61943	1.55768	4.40487	0.000282055
CYSLTR1	0.364719	0.133184	0.998774	0.0497216
RPN2	2.02651	1.30168	3.15497	0.00176394
HM13	1.82976	1.16335	2.87792	0.00892892
STT3A	1.72225	1.11577	2.65838	0.0141045
HDLBP	1.84342	1.04808	3.2423	0.0337572
SYNGR2	1.47892	1.01399	2.15704	0.0421439
LY9	0.332287	0.131156	0.841858	0.0201842
RPN1	2.36915	1.32646	4.23148	0.00356129
SMIM14	0.597747	0.460242	0.776335	0.000114265
GUCD1	0.68385	0.477138	0.980115	0.0385146
AFF3	1.32919	1.001	1.76496	0.0491948
GRB2	2.45531	1.38673	4.34731	0.00205869
DAAM1	0.679297	0.481104	0.959137	0.0280203
HSPA5	1.44982	1.01384	2.07328	0.0418234
CCR7	0.517142	0.352086	0.759574	0.000773901
SELL	0.675391	0.498502	0.915046	0.0113107
PARP15	0.542269	0.31238	0.941341	0.0296466
ADK	0.57477	0.419399	0.787701	0.000572987
GPR18	0.286246	0.126701	0.646693	0.00262818
